# Supplementary material for: Anatomical Characteristics and Variation Mechanisms on the Thick-Walled and Dwarfed Culm of Shidu Bamboo (Phyllostachys nidularia f. farcta)
Source: Front Plant Sci. 2022 May 24;13:876658. doi: 10.3389/fpls.2022.876658 (PMC9171372; doi:10.3389/fpls.2022.876658)
Supplement: Supplementary file 1 [file Table_1.xlsx]

## Sheet: Sheet1
Table S3 DEGs related to the cell wall components synthesis
ID	BinName	Log2FC	Description
node_59451_length_1676_cov_49.887711_g21482_i1	secondary metabolism.phenylpropanoids.lignin biosynthesis.C3H	-5.94	(o48956|c98a1_sorbi : 677.0) encodes coumarate 3-hydroxylase (C3H), a P450-dependent monooxygenase. Involved in lignin biosynthesis and flavonoid biosynthesis. Also affects the biosynthesis of coumarins such as scopoletin and scopolin as a branching-out-pathway from the phenylpropanoid acid level.; cytochrome P450, family 98, subfamily A, polypeptide 3 (CYP98A3).
node_62555_length_1608_cov_25.314007_g28711_i0	secondary metabolism.phenylpropanoids.lignin biosynthesis.HCT	1.922	(loc_os09g37200.1 : 716.0) At5g48930 has been shown to encode for the hydroxycinnamoyl-Coenzyme A shikimate/quinate hydroxycinnamoyltransferase (HCT) both synthesizing and catabolizing the hydroxycinnamoylesters (coumaroyl/caffeoyl shikimate and quinate) involved in the phenylpropanoid pathway. Influence on the accumulation of flavonoids which in turn inhibit auxin transport and reduce plant grow…
	cell wall.cellulose synthesis.cellulose synthase	-3.431	(loc_os02g58070.1 : 111.0)GHMP kinase family protein; FUNCTIONS IN: diphosphomevalonate decarboxylase activity, kinase activity, ATP binding.
node_48464_length_1950_cov_122.022376_g20987_i1	glycosyltransferase	1.65883	(loc_os03g55040.1 : 743.0) UDP-Glycosyltransferase superfamily protein; FUNCTIONS IN: UDP-glycosyltransferase activity, transferase activity, transferring glycosyl groups.
node_41153_length_2162_cov_292.638583_g14828_i1	ell wall.precursor synthesis.sugar kinases.arabinose-1-kinase	1.059	(loc_os02g04840.1 : 642.0)Similar to galactokinase.; arabinose kinase (ARA1); FUNCTIONS IN: L-arabinokinase activity, ATP binding, galactokinase activity; INVOLVED IN: arabinose metabolic process; GHMP kinase (InterPro:IPR006204), Galactokinase, glycosyltransferase.
node_60687_length_1649_cov_10.151650_g27838_i0	glycolysis.cytosolic branch.aldolase	6.73613	(at4g26530 : 408.0) Aldolase superfamily protein; FUNCTIONS IN: fructose-bisphosphate aldolase activity.
node_41567_length_2149_cov_3116.130058_g19427_i0	glycolysis.cytosolic branch.glyceraldehyde 3-phosphate dehydrogenase (GAP-DH)	-2.392	(loc_os08g03290.5 : 397.0) Glyceraldehyde-3-phosphate dehydrogenase, cytosolic 2. Encodes cytosolic GADPH (C subunit) involved in the glycolytic pathway but also interacts with H2O2 potentially placing it in a signalling cascade induced by ROS.; glyceraldehyde-3-phosphate dehydrogenase C subunit 1 (GAPC1)
node_54134_length_1802_cov_333.847889_g21546_i2	glycolysis.cytosolic branch.UGPase	1.911	(q43772|ugpa_horvu : 106.0) UTP--glucose-1-phosphate uridylyltransferase INVOLVED IN: response to cadmium ion, callose deposition in cell wall, response to salt stress, metabolic process, pollen development; LOCATED IN: plasma membrane.
node_49355_length_1924_cov_548.996759_g22810_i0	glycolysis.cytosolic branch.phosphofructokinase (PFK)	1.042	(loc_os06g05860.1 : 591.0)phosphofructokinase 3 (PFK3).
node_49535_length_1919_cov_792.307692_g22880_i0	glycolysis.cytosolic branch.phosphofructokinase (PFK)	1.201	(loc_os01g09570.1 : 508.0) phosphofructokinase 3 (PFK3).
node_54132_length_1802_cov_409.578369_g24891_i0	glycolysis.cytosolic branch.phosphofructokinase (PFK)	0.963	(loc_os01g09570.1 : 586.0) phosphofructokinase 3 (PFK3).
node_9145_length_4215_cov_100.223081_g599_i2	glycolysis.cytosolic branch.pyrophosphate-fructose-6-P phosphotransferase	0.828	(loc_os09g12650.1 : 225.0)Pyrophosphate--fructose 6-phosphate 1-phosphotransferase alpha subunit (EC 2.7.1.90) (PFP) (6-phosphofructokinase, pyrophosphate dependent) (Pyrophosphate-dependent 6-phosphofructose-1-kinase) (PPi-PFK).
node_13535_length_3653_cov_101.215363_g599_i3	glycolysis.cytosolic branch.pyrophosphate-fructose-6-P phosphotransferase	6.085	(loc_os09g12650.1 : 225.0)Pyrophosphate--fructose 6-phosphate 1-phosphotransferase alpha subunit (EC 2.7.1.90) (PFP) (6-phosphofructokinase, pyrophosphate dependent) (Pyrophosphate-dependent 6-phosphofructose-1-kinase) (PPi-PFK).
node_41567_length_2149_cov_3116.130058_g19427_i0	glycolysis.cytosolic branch.glyceraldehyde 3-phosphate dehydrogenase (GAP-DH)	-2.392	(loc_os08g03290.5 : 397.0)Glyceraldehyde-3-phosphate dehydrogenase, cytosolic 2.
node_54549_length_1792_cov_430.193717_g21497_i2	glycolysis.cytosolic branch.glyceraldehyde 3-phosphate dehydrogenase (GAP-DH)	6.092	(loc_os04g40950.1 : 595.0) Glyceraldehyde-3-phosphate dehydrogenase, cytosolic 3 .
node_60687_length_1649_cov_10.151650_g27838_i0	glycolysis.cytosolic branch.aldolase	6.736	(at4g26530 : 408.0) Aldolase superfamily protein; FUNCTIONS IN: fructose-bisphosphate aldolase activity.
node_61034_length_1641_cov_107.331633_g19643_i2	glycolysis.cytosolic branch.phosphoglycerate mutase	3.617	(loc_os04g01230.2 : 389.0)Phosphoglycerate mutase family protein.
node_44119_length_2074_cov_2088.136432_g20506_i0	glycolysis.cytosolic branch.enolase	1.521	(loc_os03g14450.1 : 416.0) Enolase 2 (EC 4.2.1.11) (2-phosphoglycerate dehydratase 2) (2-phospho-D-glycerate hydro-lyase 2).
node_51016_length_1880_cov_2403.369120_g20506_i1	glycolysis.cytosolic branch.enolase	0.95	(loc_os03g14450.1 : 840.0)Enolase (EC 4.2.1.11) (2-phosphoglycerate dehydratase) (2-phospho-D-glycerate hydro-lyase) (OSE1).
node_51651_length_1864_cov_2292.354551_g20506_i2	glycolysis.cytosolic branch.enolase	1.66	(loc_os03g14450.1 : 458.0)Enolase (EC 4.2.1.11) (2-phosphoglycerate dehydratase) (2-phospho-D-glycerate hydro-lyase) (OSE1).
node_92669_length_1058_cov_1494.398985_g44067_i0	glycolysis.cytosolic branch.enolase	1.426	(loc_os03g14450.1 : 332.0)Enolase (EC 4.2.1.11) (2-phosphoglycerate dehydratase) (2-phospho-D-glycerate hydro-lyase) (OSE1).
node_69077_length_1468_cov_487.569892_g31700_i0	glycolysis.cytosolic branch.phospho-enol-pyruvate carboxylase kinase (PPCK)	2.189	(loc_os02g41580.1 : 392.0)Encodes a second Arabidopsis phosphoenolpyruvate carboxylase kinase gene product with a different expression pattern from PPCK1. Expression of the gene is upregulated by exposure of the plant to light.
node_73476_length_1382_cov_1489.739496_g27945_i1	glycolysis.cytosolic branch.phospho-enol-pyruvate carboxylase kinase (PPCK)	3.055	(loc_os02g41580.1 : 410.0)Encodes a second Arabidopsis phosphoenolpyruvate carboxylase kinase gene product with a different expression pattern from PPCK1. Expression of the gene is upregulated by exposure of the plant to light.; phosphoenolpyruvate carboxylase kinase 2 (PPCK2).
node_76916_length_1319_cov_578.948636_g31700_i1	glycolysis.cytosolic branch.phospho-enol-pyruvate carboxylase kinase (PPCK)	2.512	(loc_os02g41580.1 : 401.0)Encodes a phosphoenolpyruvate carboxylase kinase that is expressed at highest levels in leaves. Expression is induced by light.; phosphoenolpyruvate carboxylase kinase 1 (PPCK1).
node_77668_length_1305_cov_224.181006_g35843_i0	glycolysis.cytosolic branch.phospho-enol-pyruvate carboxylase kinase (PPCK)	2.264	(loc_os02g41580.1 : 416.0)Encodes a second Arabidopsis phosphoenolpyruvate carboxylase kinase gene product with a different expression pattern from PPCK1. Expression of the gene is upregulated by exposure of the plant to light.
node_12283_length_3789_cov_344.392896_g6232_i0	glycolysis.plastid branch.phosphoglucomutase (PGM)	-1.266	(loc_os10g11140.1 : 381.0)(Glucose phosphomutase) (PGM) - Encodes a plastid isoform of the enzyme phosphoglucomutase involved in controlling photosynthetic carbon flow. Effective petiole movement against the direction of the gravity requires functional PGM activity that is required for full development of amyloplasts.; phosphoglucomutase (PGM).
node_22981_length_2936_cov_339.179532_g11231_i0	glycolysis.plastid branch.phosphoglucomutase (PGM)	-0.767	(loc_os07g26610.1 : 956.0)phosphoglucosamine mutase family protein; FUNCTIONS IN: intramolecular transferase activity.
node_49355_length_1924_cov_548.996759_g22810_i0	glycolysis.plastid branch.phosphofructokinase (PFK)	1.042	(loc_os06g05860.1 : 591.0)phosphofructokinase 3 (PFK3).
node_49535_length_1919_cov_792.307692_g22880_i0	glycolysis.plastid branch.phosphofructokinase (PFK)	1.201	(loc_os01g09570.1 : 508.0)phosphofructokinase 3 (PFK3).
node_54132_length_1802_cov_409.578369_g24891_i0	glycolysis.plastid branch.phosphofructokinase (PFK)	0.963	(loc_os01g09570.1 : 586.0)phosphofructokinase 3 (PFK3).
node_52273_length_1847_cov_454.033258_g24059_i0	glycolysis.plastid branch.pyruvate kinase (PK)	1.163	(loc_os10g42100.1 : 573.0)Pyruvate kinase isozyme G, chloroplast precursor. Encodes a dominant chloroplast pyruvate kinase beta subunit. Important for seed oil biosynthesis. Ubiquitously expressed, with significantly increased expression in maturing seeds. The mutant plant has wrinkled seeds, with a 50-70% reduction in seed fatty acid content.
node_97703_length_984_cov_309.525796_g2011_i10	glycolysis.plastid branch.pyruvate kinase (PK)	-4.862	(loc_os07g08340.1 : 268.0)Pyruvate kinase isozyme A, chloroplast precursor (EC 2.7.1.40) Encodes a chloroplast pyruvate kinase alpha subunit. Important for seed oil biosynthesis. Ubiquitously expressed, with significantly increased expression in maturing seeds.
node_128994_length_634_cov_328.841355_g70707_i0	glycolysis.plastid branch.pyruvate kinase (PK)	1.227	(loc_os10g42100.1 : 139.0)Encodes a chloroplast pyruvate kinase beta subunit. The enzyme is less active than the other chloroplast pyruvate kinase beta subunit encoded by AT5G52920. Involved in seed oil biosynthesis. Can partially complement the AT5G52920 mutant.; plastidial pyruvate kinase 3 (PKp3).
